# Supplementary material for: Common trust and personal safety issues: A systematic review on the acceptability of health and social interventions for persons with lived experience of homelessness
Source: PubMed Central journal article supplement (PMC6936789; doi:10.1371/journal.pone.0226306), 2019-12-30
Supplement: pone.0226306.s006.pdf [file pone.0226306.s006.pdf]

## Appendix S6: CASP assessments

| Study ID               | Was there a clear statement of the aims of the research? | Is a qualitative methodology appropriate? | Was the research design appropriate to address the aims of the research? | Was the recruitment strategy appropriate to the aims of the research? | Was the data collected in a way that addressed the research issue? | Has the relationship between researchers and participants been adequately considered? | Have ethical issues been taken into consideration? | Was the data analysis sufficiently rigorous? | Is there a clear statement of findings? | How valuable is the research? | Total score |
|------------------------|----------------------------------------------------------|-------------------------------------------|--------------------------------------------------------------------------|-----------------------------------------------------------------------|--------------------------------------------------------------------|---------------------------------------------------------------------------------------|----------------------------------------------------|----------------------------------------------|-----------------------------------------|-------------------------------|-------------|
| Alhusen et al. 2017    | Yes                                                      | Yes                                       | Yes                                                                      | Can't tell                                                            | Yes                                                                | Can't tell                                                                            | Yes                                                | Yes                                          | Yes                                     | Yes                           | 9           |
| Archard & Murphy 2015  | Yes                                                      | Yes                                       | No                                                                       | Yes                                                                   | Yes                                                                | No                                                                                    | Yes                                                | Can't tell                                   | Yes                                     | Yes                           | 7.5         |
| Aviles & Helfrich 2004 | Yes                                                      | Yes                                       | Can't tell                                                               | Yes                                                                   | Yes                                                                | No                                                                                    | Can't tell                                         | Yes                                          | Yes                                     | Can't tell                    | 7.5         |
| Barker et al. 2018     | Yes                                                      | Yes                                       | Yes                                                                      | Can't tell                                                            | Yes                                                                | Can't tell                                                                            | Yes                                                | Yes                                          | Yes                                     | Yes                           | 9           |
| Canham et al. 2019     | Yes                                                      | Yes                                       | Yes                                                                      | Yes                                                                   | Yes                                                                | No                                                                                    | Yes                                                | Yes                                          | Yes                                     | Yes                           | 9           |
| Chaturvedi 2016        | Yes                                                      | Yes                                       | Yes                                                                      | Yes                                                                   | Yes                                                                | Yes                                                                                   | Yes                                                | Yes                                          | Yes                                     | Yes                           | 10          |
| Collins et al. 2012    | Yes                                                      | Yes                                       | Yes                                                                      | Can't tell                                                            | Yes                                                                | No                                                                                    | Can't tell                                         | Yes                                          | Yes                                     | Yes                           | 8           |
| Cormack 2009           | Yes                                                      | Yes                                       | Can't tell                                                               | Yes                                                                   | Yes                                                                | Yes                                                                                   | Yes                                                | Yes                                          | Can't tell                              | Yes                           | 9           |
| Davis et al. 2012      | Yes                                                      | Yes                                       | Yes                                                                      | Yes                                                                   | Yes                                                                | Yes                                                                                   | Yes                                                | Yes                                          | Yes                                     | Yes                           | 10          |
| Farquhar et al. 2014   | Yes                                                      | Yes                                       | Can't tell                                                               | Yes                                                                   | Yes                                                                | Yes                                                                                   | Yes                                                | Yes                                          | Yes                                     | Yes                           | 9.5         |
| Ferguson & Islam 2008  | Yes                                                      | Yes                                       | Yes                                                                      | Yes                                                                   | Yes                                                                | Yes                                                                                   | Yes                                                | Yes                                          | Yes                                     | Yes                           | 10          |
| Guilcher et al. 2016   | Yes                                                      | Yes                                       | Yes                                                                      | Yes                                                                   | Yes                                                                | No                                                                                    | Yes                                                | Yes                                          | Yes                                     | Yes                           | 9           |

|                         |     |     |            |            |            |            |            |            |     |     |            |     |
|-------------------------|-----|-----|------------|------------|------------|------------|------------|------------|-----|-----|------------|-----|
| Gultekin et al. 2014    | Yes | Yes | Yes        | Yes        | Yes        | Yes        | Yes        | Yes        | Yes | Yes | Can't tell | 9.5 |
| Holt Schneider 2016     | Yes | Yes | Yes        | Yes        | Yes        | No         | Can't tell | Yes        | Yes | Yes | Yes        | 8.5 |
| Jost et al. 2011        | Yes | Yes | Yes        | Yes        | Yes        | Yes        | Yes        | Yes        | Yes | Yes | Yes        | 10  |
| Kozloff et al. 2013     | Yes | Yes | Yes        | Yes        | Yes        | Can't tell | Yes        | Yes        | Yes | Yes | Yes        | 9.5 |
| Lamanaa et al. 2018     | Yes | Yes | Yes        | Yes        | Yes        | Can't tell | Yes        | Yes        | Yes | Yes | Yes        | 9.5 |
| Lorelle & Grothaus 2015 | Yes | Yes | Yes        | Yes        | Yes        | Yes        | Yes        | Yes        | Yes | Yes | Yes        | 10  |
| Macnaughton et al. 2016 | Yes | Yes | Yes        | Yes        | Can't tell | No         | No         | Yes        | Yes | Yes | Yes        | 7.5 |
| Macneil & Pauly 2011    | Yes | Yes | Yes        | Can't tell | Yes        | No         | Yes        | Can't tell | Yes | Yes | Yes        | 8   |
| Magee et al. 2008       | Yes | Yes | Yes        | Can't tell | Yes        | No         | Yes        | Yes        | Yes | Yes | Yes        | 8.5 |
| McMaster et al. 2017    | Yes | Yes | No         | Can't tell | Yes        | No         | Yes        | Yes        | Yes | Yes | Yes        | 7.5 |
| Mitchell et al. 2017    | Yes | Yes | Yes        | Yes        | Yes        | Can't tell | Yes        | Yes        | Yes | Yes | Yes        | 9.5 |
| Patterson et al. 2015   | Yes | Yes | Yes        | Yes        | Yes        | No         | Yes        | Yes        | Yes | Yes | Yes        | 9   |
| Patterson et al. 2013   | Yes | Yes | Can't tell | Yes        | Can't tell | No         | Yes        | Yes        | Yes | Yes | Yes        | 8   |
| Perreault et al. 2016   | Yes | Yes | No         | Yes        | Yes        | No         | Yes        | Yes        | Yes | Yes | Yes        | 8   |
| Ploeg et al. 2008       | Yes | Yes | Yes        | Yes        | Can't tell | No         | Yes        | Yes        | Yes | Yes | Yes        | 8.5 |

|                      |     |     |     |            |            |            |            |     |     |     |     |
|----------------------|-----|-----|-----|------------|------------|------------|------------|-----|-----|-----|-----|
| Poremski et al. 2016 | Yes | Yes | No  | Yes        | Can't tell | No         | Yes        | Yes | Yes | Yes | 7.5 |
| Quinn et al. 2015    | Yes | Yes | Yes | Yes        | Yes        | No         | Yes        | Yes | Yes | Yes | 9   |
| Radey & Wilkins 2010 | Yes | Yes | No  | Can't tell | Yes        | No         | Yes        | Yes | Yes | Yes | 7.5 |
| Stewart et al. 2010  | Yes | Yes | Yes | Yes        | Yes        | No         | Yes        | Yes | Yes | Yes | 9   |
| Taylor et al. 2007   | Yes | Yes | Yes | Can't tell | No         | Yes        | Yes        | Yes | Yes | Yes | 8.5 |
| Thompson et al. 2006 | Yes | Yes | Yes | Yes        | Yes        | No         | Can't tell | Yes | Yes | Yes | 8.5 |
| Wright et al. 2006   | Yes | Yes | No  | Yes        | Yes        | Can't tell | Yes        | Yes | Yes | Yes | 8.5 |
| Yamin et al. 2014    | Yes | Yes | No  | Can't tell | Yes        | No         | Yes        | Yes | Yes | Yes | 7.5 |

The studies were assessed using a score from 1 to 10, with 10 being of highest quality and 1 the lowest. Studies were awarded 1 point for each "yes", 0.5 points for "can't tell" and 0 points for "no" (Butler et al., 2016). We excluded studies that scored below the 7.5 quality threshold. The mean CASP score for our included studies was 8.71 (SD 0.83).
