# Supplementary material for: Common trust and personal safety issues: A systematic review on the acceptability of health and social interventions for persons with lived experience of homelessness
Source: PLOS journal article supplement (doi:10.1371/journal.pone.0226306), 2019-12-30
Supplement: S5 (10.1371/journal.pone.0226306.s005) [file journal.pone.0226306.s005]

## Appendix V: Grey Literature Search

| Source consulted                          | Search terms                                                                                                                                                                                                                                                                                                                                                                       |
|-------------------------------------------|------------------------------------------------------------------------------------------------------------------------------------------------------------------------------------------------------------------------------------------------------------------------------------------------------------------------------------------------------------------------------------|
| Homeless Hub                              | <ol style="list-style-type: none"><li>1. "Homeless" AND</li><li>2. "Housing First" OR "Mental Health" OR "Case Management" OR "Addictions" OR "Harm Reduction" OR "Income" AND</li><li>3. "Acceptance" OR "Access" OR "Acceptability" OR "Accessibility" OR "Qualitative"</li></ol> <p>Population-specific terms: "Women" OR "Mother" OR "Children" OR "Youth" OR "Disability"</p> |
| Health Canada                             |                                                                                                                                                                                                                                                                                                                                                                                    |
| Public Health Agency of Canada            |                                                                                                                                                                                                                                                                                                                                                                                    |
| Canadian Public Health Association        |                                                                                                                                                                                                                                                                                                                                                                                    |
| Canadian Mortgage and Housing Corporation |                                                                                                                                                                                                                                                                                                                                                                                    |
